# Supplementary material
Source: Springer Nature journal article supplement (https://www.springermedizin.de/resource/supplementary/12877_2013_913_MOESM2_ESM.pdf/9440408)

**A**

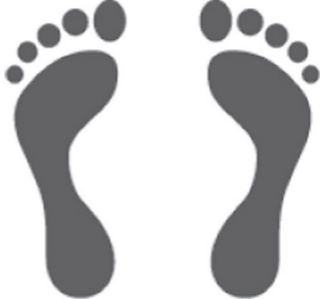

**B**

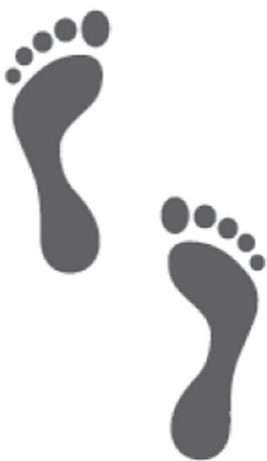

**C**

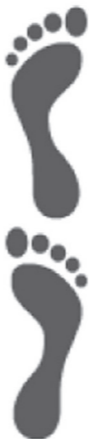

**D**

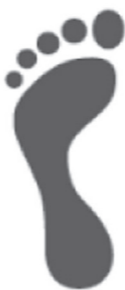

Supplement: MOESM2 [file 9440408]
